# Supplementary material for: Integrating evidence, models and maps to enhance Chagas disease vector surveillance
Source: PLoS Negl Trop Dis. 2018 Nov 29;12(11):e0006883. doi: 10.1371/journal.pntd.0006883 (PMC6289469; doi:10.1371/journal.pntd.0006883)
Supplement: S1 Dataset — Data collected in the study comparing surveillance using the VectorPoint app and paper maps. (XLSX) [file pntd.0006883.s001.xlsx]

## Sheet: data 040618
Inspector	Arm	Date	House risk level (English)	Visit outcome: Inspection	Visit outcome: Closed	Visit outcome: Rejected	Visit outcome: Return	Visit outcome: Interview	Total Visits	House risk level (Spanish)
A	paper map	2017-12-04	lowest	0	3	0	0	0	3	mas bajo
A	paper map	2017-12-04	low	2	0	0	0	0	2	bajo
A	paper map	2017-12-04	medium	0	0	0	0	0	0	medio
A	paper map	2017-12-04	high	1	4	0	0	0	5	alto
A	paper map	2017-12-04	highest	3	3	0	1	0	7	mas alto
A	paper map	2017-12-05	lowest	4	2	0	0	0	6	mas bajo
A	paper map	2017-12-05	low	0	1	0	0	0	1	bajo
A	paper map	2017-12-05	medium	3	3	0	0	0	6	medio
A	paper map	2017-12-05	high	1	2	0	0	0	3	alto
A	paper map	2017-12-05	highest	0	0	0	0	0	0	mas alto
A	paper map	2017-12-06	lowest	0	0	0	0	0	0	mas bajo
A	paper map	2017-12-06	low	0	0	0	0	0	0	bajo
A	paper map	2017-12-06	medium	2	2	0	0	0	4	medio
A	paper map	2017-12-06	high	2	4	1	0	0	7	alto
A	paper map	2017-12-06	highest	4	4	0	0	0	8	mas alto
A	paper map	2017-12-07	lowest	2	1	1	1	0	5	mas bajo
A	paper map	2017-12-07	low	1	4	1	0	0	6	bajo
A	paper map	2017-12-07	medium	3	5	0	0	0	8	medio
A	paper map	2017-12-07	high	1	0	0	0	0	1	alto
A	paper map	2017-12-07	highest	0	0	0	0	0	0	mas alto
A	paper map	2017-12-08	lowest	1	1	0	0	0	2	mas bajo
A	paper map	2017-12-08	low	2	1	1	0	0	4	bajo
A	paper map	2017-12-08	medium	1	3	0	0	0	4	medio
A	paper map	2017-12-08	high	3	1	1	0	0	5	alto
A	paper map	2017-12-08	highest	1	2	0	0	0	3	mas alto
A	app	2017-12-11	lowest	5	8	4	0	0	17	mas bajo
A	app	2017-12-11	low	2	5	1	0	0	8	bajo
A	app	2017-12-11	medium	0	0	0	1	0	1	medio
A	app	2017-12-11	high	0	0	0	0	0	0	alto
A	app	2017-12-11	highest	0	0	0	0	0	0	mas alto
A	app	2017-12-12	lowest	0	0	0	0	0	0	mas bajo
A	app	2017-12-12	low	0	0	0	0	0	0	bajo
A	app	2017-12-12	medium	8	4	1	0	0	13	medio
A	app	2017-12-12	high	1	3	0	0	0	4	alto
A	app	2017-12-12	highest	0	0	0	0	0	0	mas alto
A	app	2017-12-13	lowest	0	0	0	0	0	0	mas bajo
A	app	2017-12-13	low	0	0	0	0	0	0	bajo
A	app	2017-12-13	medium	3	2	2	0	0	7	medio
A	app	2017-12-13	high	5	3	3	0	0	11	alto
A	app	2017-12-13	highest	0	2	0	0	0	2	mas alto
A	app	2017-12-14	lowest	0	0	0	0	0	0	mas bajo
A	app	2017-12-14	low	0	0	0	0	0	0	bajo
A	app	2017-12-14	medium	0	0	0	0	0	0	medio
A	app	2017-12-14	high	6	3	0	0	0	9	alto
A	app	2017-12-14	highest	4	0	0	0	0	4	mas alto
A	app	2017-12-15	lowest	0	0	0	0	0	0	mas bajo
A	app	2017-12-15	low	0	0	0	0	0	0	bajo
A	app	2017-12-15	medium	0	0	0	0	0	0	medio
A	app	2017-12-15	high	3	1	0	0	0	4	alto
A	app	2017-12-15	highest	7	1	0	0	0	8	mas alto
B	paper map	2017-12-04	lowest	3	2	0	1	0	6	mas bajo
B	paper map	2017-12-04	low	1	1	0	0	0	2	bajo
B	paper map	2017-12-04	medium	3	1	0	2	0	6	medio
B	paper map	2017-12-04	high	0	0	0	3	0	3	alto
B	paper map	2017-12-04	highest	1	1	0	1	0	3	mas alto
B	paper map	2017-12-05	lowest	0	1	0	0	0	1	mas bajo
B	paper map	2017-12-05	low	1	2	0	0	0	3	bajo
B	paper map	2017-12-05	medium	0	0	0	0	0	0	medio
B	paper map	2017-12-05	high	5	3	0	1	0	9	alto
B	paper map	2017-12-05	highest	4	6	0	2	0	12	mas alto
B	paper map	2017-12-06	lowest	0	0	0	0	0	0	mas bajo
B	paper map	2017-12-06	low	0	0	0	0	0	0	bajo
B	paper map	2017-12-06	medium	2	0	0	0	0	2	medio
B	paper map	2017-12-06	high	3	1	1	1	0	6	alto
B	paper map	2017-12-06	highest	7	13	0	2	0	22	mas alto
B	paper map	2017-12-07	lowest	0	1	0	2	0	3	mas bajo
B	paper map	2017-12-07	low	0	0	0	0	0	0	bajo
B	paper map	2017-12-07	medium	1	1	0	0	0	2	medio
B	paper map	2017-12-07	high	4	6	0	3	0	13	alto
B	paper map	2017-12-07	highest	6	3	1	0	0	10	mas alto
B	paper map	2017-12-08	lowest	0	1	0	4	0	5	mas bajo
B	paper map	2017-12-08	low	2	0	0	3	0	5	bajo
B	paper map	2017-12-08	medium	1	4	0	2	0	7	medio
B	paper map	2017-12-08	high	3	4	0	4	0	11	alto
B	paper map	2017-12-08	highest	2	5	0	3	0	10	mas alto
B	app	2017-12-11	lowest	0	0	0	0	0	0	mas bajo
B	app	2017-12-11	low	0	0	0	0	0	0	bajo
B	app	2017-12-11	medium	0	0	0	0	0	0	medio
B	app	2017-12-11	high	2	4	1	5	0	12	alto
B	app	2017-12-11	highest	8	17	4	7	0	36	mas alto
B	app	2017-12-12	lowest	0	0	0	0	0	0	mas bajo
B	app	2017-12-12	low	0	0	0	0	0	0	bajo
B	app	2017-12-12	medium	0	0	0	0	0	0	medio
B	app	2017-12-12	high	1	0	1	1	0	3	alto
B	app	2017-12-12	highest	9	13	1	9	0	32	mas alto
B	app	2017-12-13	lowest	0	0	0	0	0	0	mas bajo
B	app	2017-12-13	low	0	0	0	0	0	0	bajo
B	app	2017-12-13	medium	0	0	0	1	0	1	medio
B	app	2017-12-13	high	2	2	0	0	0	4	alto
B	app	2017-12-13	highest	7	27	0	9	0	43	mas alto
B	app	2017-12-14	lowest	0	0	0	0	0	0	mas bajo
B	app	2017-12-14	low	0	0	0	0	0	0	bajo
B	app	2017-12-14	medium	0	0	0	0	0	0	medio
B	app	2017-12-14	high	0	0	0	0	0	0	alto
B	app	2017-12-14	highest	23	0	1	3	0	27	mas alto
B	app	2017-12-15	lowest	0	0	0	0	0	0	mas bajo
B	app	2017-12-15	low	0	0	0	0	0	0	bajo
B	app	2017-12-15	medium	0	0	0	2	0	2	medio
B	app	2017-12-15	high	3	3	0	1	0	7	alto
B	app	2017-12-15	highest	10	2	1	4	0	17	mas alto
C	app	2017-12-04	lowest	0	2	3	0	0	5	mas bajo
C	app	2017-12-04	low	0	2	3	1	0	6	bajo
C	app	2017-12-04	medium	0	0	1	1	0	2	medio
C	app	2017-12-04	high	1	2	1	0	0	4	alto
C	app	2017-12-04	highest	3	3	1	1	0	8	mas alto
C	app	2017-12-05	lowest	1	8	4	2	0	15	mas bajo
C	app	2017-12-05	low	1	12	7	0	0	20	bajo
C	app	2017-12-05	medium	0	3	5	1	0	9	medio
C	app	2017-12-05	high	0	0	2	0	0	2	alto
C	app	2017-12-05	highest	2	1	1	0	0	4	mas alto
C	app	2017-12-06	lowest	0	1	1	0	0	2	mas bajo
C	app	2017-12-06	low	1	4	3	2	0	10	bajo
C	app	2017-12-06	medium	1	2	5	1	0	9	medio
C	app	2017-12-06	high	3	2	1	2	0	8	alto
C	app	2017-12-06	highest	4	0	4	0	0	8	mas alto
C	app	2017-12-07	lowest	1	0	0	0	0	1	mas bajo
C	app	2017-12-07	low	3	1	0	0	0	4	bajo
C	app	2017-12-07	medium	2	0	1	1	0	4	medio
C	app	2017-12-07	high	1	2	1	0	0	4	alto
C	app	2017-12-07	highest	2	0	0	0	0	2	mas alto
C	app	2017-12-08	lowest	0	0	0	0	0	0	mas bajo
C	app	2017-12-08	low	0	0	0	0	0	0	bajo
C	app	2017-12-08	medium	1	0	4	0	0	5	medio
C	app	2017-12-08	high	1	4	5	0	0	10	alto
C	app	2017-12-08	highest	3	8	10	1	0	22	mas alto
C	paper map	2017-12-11	lowest	0	2	3	2	0	7	mas bajo
C	paper map	2017-12-11	low	2	4	5	0	0	11	bajo
C	paper map	2017-12-11	medium	0	3	6	1	0	10	medio
C	paper map	2017-12-11	high	0	7	5	0	0	12	alto
C	paper map	2017-12-11	highest	1	4	3	1	0	9	mas alto
C	paper map	2017-12-12	lowest	1	8	8	0	0	17	mas bajo
C	paper map	2017-12-12	low	1	3	6	0	0	10	bajo
C	paper map	2017-12-12	medium	0	4	10	0	0	14	medio
C	paper map	2017-12-12	high	0	0	2	0	0	2	alto
C	paper map	2017-12-12	highest	0	0	0	0	0	0	mas alto
C	paper map	2017-12-13	lowest	2	0	1	0	0	3	mas bajo
C	paper map	2017-12-13	low	1	1	5	0	0	7	bajo
C	paper map	2017-12-13	medium	0	2	2	0	0	4	medio
C	paper map	2017-12-13	high	2	2	3	0	0	7	alto
C	paper map	2017-12-13	highest	0	0	0	0	0	0	mas alto
C	paper map	2017-12-14	lowest	0	0	3	0	0	3	mas bajo
C	paper map	2017-12-14	low	2	3	3	0	0	8	bajo
C	paper map	2017-12-14	medium	1	2	6	0	0	9	medio
C	paper map	2017-12-14	high	0	6	7	0	0	13	alto
C	paper map	2017-12-14	highest	1	4	2	0	0	7	mas alto
C	paper map	2017-12-15	lowest	0	1	1	0	0	2	mas bajo
C	paper map	2017-12-15	low	0	2	6	0	0	8	bajo
C	paper map	2017-12-15	medium	0	0	0	0	0	0	medio
C	paper map	2017-12-15	high	3	1	1	0	0	5	alto
C	paper map	2017-12-15	highest	2	4	1	0	0	7	mas alto
D	paper map	2017-12-04	lowest	0	0	0	1	0	1	mas bajo
D	paper map	2017-12-04	low	2	1	0	0	0	3	bajo
D	paper map	2017-12-04	medium	7	2	0	0	0	9	medio
D	paper map	2017-12-04	high	2	0	0	0	0	2	alto
D	paper map	2017-12-04	highest	2	1	0	0	0	3	mas alto
D	paper map	2017-12-05	lowest	2	0	0	0	0	2	mas bajo
D	paper map	2017-12-05	low	4	2	0	0	0	6	bajo
D	paper map	2017-12-05	medium	1	1	0	0	0	2	medio
D	paper map	2017-12-05	high	4	2	0	0	0	6	alto
D	paper map	2017-12-05	highest	3	1	0	0	0	4	mas alto
D	paper map	2017-12-06	lowest	1	0	0	0	0	1	mas bajo
D	paper map	2017-12-06	low	3	0	0	0	0	3	bajo
D	paper map	2017-12-06	medium	5	1	0	0	0	6	medio
D	paper map	2017-12-06	high	2	0	0	0	0	2	alto
D	paper map	2017-12-06	highest	3	1	0	1	0	5	mas alto
D	paper map	2017-12-07	lowest	0	0	0	0	0	0	mas bajo
D	paper map	2017-12-07	low	0	0	0	0	0	0	bajo
D	paper map	2017-12-07	medium	0	0	0	0	0	0	medio
D	paper map	2017-12-07	high	5	1	0	0	0	6	alto
D	paper map	2017-12-07	highest	12	2	0	0	0	14	mas alto
D	paper map	2017-12-08	lowest	0	0	0	0	0	0	mas bajo
D	paper map	2017-12-08	low	3	0	0	0	0	3	bajo
D	paper map	2017-12-08	medium	5	0	0	0	0	5	medio
D	paper map	2017-12-08	high	2	1	0	0	0	3	alto
D	paper map	2017-12-08	highest	8	1	0	0	0	9	mas alto
D	app	2017-12-11	lowest	0	0	0	0	0	0	mas bajo
D	app	2017-12-11	low	0	0	0	0	0	0	bajo
D	app	2017-12-11	medium	2	0	0	0	0	2	medio
D	app	2017-12-11	high	8	1	0	0	0	9	alto
D	app	2017-12-11	highest	5	9	0	0	0	14	mas alto
D	app	2017-12-12	lowest	0	0	0	0	0	0	mas bajo
D	app	2017-12-12	low	0	0	0	0	0	0	bajo
D	app	2017-12-12	medium	0	0	0	0	0	0	medio
D	app	2017-12-12	high	10	5	0	1	0	16	alto
D	app	2017-12-12	highest	4	3	0	0	0	7	mas alto
D	app	2017-12-13	lowest	0	0	0	0	0	0	mas bajo
D	app	2017-12-13	low	0	0	0	0	0	0	bajo
D	app	2017-12-13	medium	0	0	0	0	0	0	medio
D	app	2017-12-13	high	2	0	0	0	0	2	alto
D	app	2017-12-13	highest	14	2	0	0	0	16	mas alto
D	app	2017-12-14	lowest	0	0	0	0	0	0	mas bajo
D	app	2017-12-14	low	0	0	0	0	0	0	bajo
D	app	2017-12-14	medium	0	0	0	0	0	0	medio
D	app	2017-12-14	high	0	0	0	0	0	0	alto
D	app	2017-12-14	highest	16	2	0	0	0	18	mas alto
D	app	2017-12-15	lowest	0	0	0	0	0	0	mas bajo
D	app	2017-12-15	low	0	0	0	0	0	0	bajo
D	app	2017-12-15	medium	0	0	0	0	0	0	medio
D	app	2017-12-15	high	0	0	0	0	0	0	alto
D	app	2017-12-15	highest	20	7	0	0	0	27	mas alto
E	paper map	2017-12-04	lowest	0	1	0	0	0	1	mas bajo
E	paper map	2017-12-04	low	3	0	0	3	0	6	bajo
E	paper map	2017-12-04	medium	3	1	2	0	0	6	medio
E	paper map	2017-12-04	high	2	1	0	0	0	3	alto
E	paper map	2017-12-04	highest	1	1	0	1	0	3	mas alto
E	paper map	2017-12-05	lowest	0	1	0	0	0	1	mas bajo
E	paper map	2017-12-05	low	1	0	0	2	0	3	bajo
E	paper map	2017-12-05	medium	1	3	1	1	0	6	medio
E	paper map	2017-12-05	high	4	6	1	4	0	15	alto
E	paper map	2017-12-05	highest	2	2	1	0	0	5	mas alto
E	paper map	2017-12-06	lowest	0	0	0	0	0	0	mas bajo
E	paper map	2017-12-06	low	1	0	0	0	0	1	bajo
E	paper map	2017-12-06	medium	1	0	0	0	0	1	medio
E	paper map	2017-12-06	high	1	6	0	4	0	11	alto
E	paper map	2017-12-06	highest	5	5	1	1	0	12	mas alto
E	paper map	2017-12-07	lowest	1	1	0	0	0	2	mas bajo
E	paper map	2017-12-07	low	1	1	0	0	0	2	bajo
E	paper map	2017-12-07	medium	3	2	1	1	0	7	medio
E	paper map	2017-12-07	high	2	2	2	1	0	7	alto
E	paper map	2017-12-07	highest	2	2	0	1	0	5	mas alto
E	paper map	2017-12-08	lowest	2	4	2	0	0	8	mas bajo
E	paper map	2017-12-08	low	2	1	0	0	0	3	bajo
E	paper map	2017-12-08	medium	3	3	0	2	0	8	medio
E	paper map	2017-12-08	high	1	2	0	1	0	4	alto
E	paper map	2017-12-08	highest	1	0	1	1	0	3	mas alto
E	app	2017-12-11	lowest	0	0	0	0	0	0	mas bajo
E	app	2017-12-11	low	0	1	0	0	0	1	bajo
E	app	2017-12-11	medium	0	2	0	0	0	2	medio
E	app	2017-12-11	high	2	7	2	0	0	11	alto
E	app	2017-12-11	highest	5	7	3	6	0	21	mas alto
E	app	2017-12-12	lowest	0	0	0	0	0	0	mas bajo
E	app	2017-12-12	low	0	0	0	0	0	0	bajo
E	app	2017-12-12	medium	1	0	0	0	0	1	medio
E	app	2017-12-12	high	2	0	0	0	0	2	alto
E	app	2017-12-12	highest	9	7	1	0	0	17	mas alto
E	app	2017-12-13	lowest	2	4	3	0	0	9	mas bajo
E	app	2017-12-13	low	1	1	0	0	0	2	bajo
E	app	2017-12-13	medium	3	2	0	0	0	5	medio
E	app	2017-12-13	high	1	2	0	0	0	3	alto
E	app	2017-12-13	highest	1	4	1	1	0	7	mas alto
E	app	2017-12-14	lowest	0	0	0	0	0	0	mas bajo
E	app	2017-12-14	low	0	0	0	0	0	0	bajo
E	app	2017-12-14	medium	0	0	0	0	0	0	medio
E	app	2017-12-14	high	1	4	0	0	0	5	alto
E	app	2017-12-14	highest	8	7	2	2	0	19	mas alto
E	app	2017-12-15	lowest	0	0	0	0	0	0	mas bajo
E	app	2017-12-15	low	0	0	0	0	0	0	bajo
E	app	2017-12-15	medium	0	0	0	0	0	0	medio
E	app	2017-12-15	high	2	4	4	0	0	10	alto
E	app	2017-12-15	highest	8	6	0	1	0	15	mas alto
F	app	2017-12-04	lowest	0	0	0	0	0	0	mas bajo
F	app	2017-12-04	low	0	0	0	0	0	0	bajo
F	app	2017-12-04	medium	1	0	0	0	0	1	medio
F	app	2017-12-04	high	6	5	0	0	0	11	alto
F	app	2017-12-04	highest	2	2	0	2	0	6	mas alto
F	app	2017-12-05	lowest	1	1	0	1	0	3	mas bajo
F	app	2017-12-05	low	3	0	0	0	0	3	bajo
F	app	2017-12-05	medium	1	3	0	0	0	4	medio
F	app	2017-12-05	high	4	1	2	1	0	8	alto
F	app	2017-12-05	highest	1	3	0	4	0	8	mas alto
F	app	2017-12-06	lowest	4	7	1	0	0	12	mas bajo
F	app	2017-12-06	low	1	3	0	0	0	4	bajo
F	app	2017-12-06	medium	3	4	2	1	0	10	medio
F	app	2017-12-06	high	0	1	0	0	0	1	alto
F	app	2017-12-06	highest	2	3	1	0	0	6	mas alto
F	app	2017-12-07	lowest	0	0	0	0	0	0	mas bajo
F	app	2017-12-07	low	0	0	0	0	0	0	bajo
F	app	2017-12-07	medium	0	0	0	0	0	0	medio
F	app	2017-12-07	high	3	5	0	0	0	8	alto
F	app	2017-12-07	highest	5	7	4	2	0	18	mas alto
F	app	2017-12-08	lowest	0	0	0	0	0	0	mas bajo
F	app	2017-12-08	low	0	1	0	0	0	1	bajo
F	app	2017-12-08	medium	1	0	0	0	0	1	medio
F	app	2017-12-08	high	3	2	0	3	0	8	alto
F	app	2017-12-08	highest	6	5	1	1	0	13	mas alto
F	paper map	2017-12-11	lowest	0	0	0	0	0	0	mas bajo
F	paper map	2017-12-11	low	0	3	1	1	0	5	bajo
F	paper map	2017-12-11	medium	0	0	0	0	0	0	medio
F	paper map	2017-12-11	high	10	13	3	0	0	26	alto
F	paper map	2017-12-11	highest	0	0	0	0	0	0	mas alto
F	paper map	2017-12-12	lowest	0	0	0	0	0	0	mas bajo
F	paper map	2017-12-12	low	5	2	0	1	0	8	bajo
F	paper map	2017-12-12	medium	6	8	3	1	0	18	medio
F	paper map	2017-12-12	high	0	0	0	0	0	0	alto
F	paper map	2017-12-12	highest	0	0	0	0	0	0	mas alto
F	paper map	2017-12-13	lowest	0	0	0	0	0	0	mas bajo
F	paper map	2017-12-13	low	0	0	0	0	0	0	bajo
F	paper map	2017-12-13	medium	7	13	8	7	0	35	medio
F	paper map	2017-12-13	high	0	0	0	0	0	0	alto
F	paper map	2017-12-13	highest	0	0	0	0	0	0	mas alto
F	paper map	2017-12-14	lowest	0	0	0	0	0	0	mas bajo
F	paper map	2017-12-14	low	1	7	1	3	0	12	bajo
F	paper map	2017-12-14	medium	4	5	2	3	0	14	medio
F	paper map	2017-12-14	high	0	0	0	0	0	0	alto
F	paper map	2017-12-14	highest	0	0	0	0	0	0	mas alto
F	paper map	2017-12-15	lowest	1	1	0	0	0	2	mas bajo
F	paper map	2017-12-15	low	7	15	0	1	0	23	bajo
F	paper map	2017-12-15	medium	2	0	0	0	0	2	medio
F	paper map	2017-12-15	high	0	0	0	0	0	0	alto
F	paper map	2017-12-15	highest	0	0	0	0	0	0	mas alto
G	app	2017-12-04	lowest	2	7	0	0	0	9	mas bajo
G	app	2017-12-04	low	4	2	2	0	0	8	bajo
G	app	2017-12-04	medium	1	2	1	0	0	4	medio
G	app	2017-12-04	high	0	2	1	1	0	4	alto
G	app	2017-12-04	highest	1	0	0	0	0	1	mas alto
G	app	2017-12-05	lowest	0	0	0	0	0	0	mas bajo
G	app	2017-12-05	low	0	0	0	1	0	1	bajo
G	app	2017-12-05	medium	0	0	0	0	0	0	medio
G	app	2017-12-05	high	4	0	1	1	0	6	alto
G	app	2017-12-05	highest	5	3	0	1	0	9	mas alto
G	app	2017-12-06	lowest	1	1	0	0	0	2	mas bajo
G	app	2017-12-06	low	1	0	0	0	0	1	bajo
G	app	2017-12-06	medium	4	2	0	1	0	7	medio
G	app	2017-12-06	high	1	2	0	0	0	3	alto
G	app	2017-12-06	highest	5	1	0	0	0	6	mas alto
G	app	2017-12-07	lowest	1	3	1	0	1	6	mas bajo
G	app	2017-12-07	low	2	3	1	1	1	8	bajo
G	app	2017-12-07	medium	1	4	1	0	3	9	medio
G	app	2017-12-07	high	2	2	1	0	1	6	alto
G	app	2017-12-07	highest	0	3	0	0	0	3	mas alto
G	app	2017-12-08	lowest	3	0	1	0	0	4	mas bajo
G	app	2017-12-08	low	0	1	1	1	0	3	bajo
G	app	2017-12-08	medium	6	1	0	2	0	9	medio
G	app	2017-12-08	high	2	1	0	0	0	3	alto
G	app	2017-12-08	highest	0	0	0	0	0	0	mas alto
G	paper map	2017-12-11	lowest	0	0	0	0	0	0	mas bajo
G	paper map	2017-12-11	low	0	0	0	0	0	0	bajo
G	paper map	2017-12-11	medium	0	0	0	0	0	0	medio
G	paper map	2017-12-11	high	15	3	0	2	0	20	alto
G	paper map	2017-12-11	highest	0	0	0	0	0	0	mas alto
G	paper map	2017-12-12	lowest	0	0	0	0	0	0	mas bajo
G	paper map	2017-12-12	low	0	0	0	0	0	0	bajo
G	paper map	2017-12-12	medium	0	0	0	0	0	0	medio
G	paper map	2017-12-12	high	12	7	0	1	0	20	alto
G	paper map	2017-12-12	highest	0	0	0	0	0	0	mas alto
G	paper map	2017-12-13	lowest	0	0	0	0	0	0	mas bajo
G	paper map	2017-12-13	low	0	0	0	0	0	0	bajo
G	paper map	2017-12-13	medium	0	0	0	0	0	0	medio
G	paper map	2017-12-13	high	8	6	1	2	0	17	alto
G	paper map	2017-12-13	highest	0	0	0	0	0	0	mas alto
G	paper map	2017-12-14	lowest	0	0	0	0	0	0	mas bajo
G	paper map	2017-12-14	low	0	0	0	0	0	0	bajo
G	paper map	2017-12-14	medium	0	0	0	0	0	0	medio
G	paper map	2017-12-14	high	10	10	2	2	0	24	alto
G	paper map	2017-12-14	highest	0	0	0	0	0	0	mas alto
G	paper map	2017-12-15	lowest	0	0	0	0	0	0	mas bajo
G	paper map	2017-12-15	low	0	0	0	0	0	0	bajo
G	paper map	2017-12-15	medium	0	0	0	0	0	0	medio
G	paper map	2017-12-15	high	9	10	0	3	0	22	alto
G	paper map	2017-12-15	highest	2	8	0	1	0	11	mas alto
H	app	2017-12-04	lowest	0	0	0	0	0	0	mas bajo
H	app	2017-12-04	low	0	0	0	0	0	0	bajo
H	app	2017-12-04	medium	0	0	0	0	0	0	medio
H	app	2017-12-04	high	4	2	2	4	0	12	alto
H	app	2017-12-04	highest	4	8	2	1	0	15	mas alto
H	app	2017-12-05	lowest	0	0	0	0	0	0	mas bajo
H	app	2017-12-05	low	0	0	0	0	0	0	bajo
H	app	2017-12-05	medium	0	0	0	0	0	0	medio
H	app	2017-12-05	high	0	0	0	0	0	0	alto
H	app	2017-12-05	highest	6	8	0	1	0	15	mas alto
H	app	2017-12-06	lowest	0	0	0	0	0	0	mas bajo
H	app	2017-12-06	low	0	0	0	0	0	0	bajo
H	app	2017-12-06	medium	0	0	0	0	0	0	medio
H	app	2017-12-06	high	0	1	0	0	0	1	alto
H	app	2017-12-06	highest	9	6	3	0	0	18	mas alto
H	app	2017-12-07	lowest	0	0	0	0	0	0	mas bajo
H	app	2017-12-07	low	1	0	0	0	0	1	bajo
H	app	2017-12-07	medium	0	2	1	2	0	5	medio
H	app	2017-12-07	high	2	4	3	1	0	10	alto
H	app	2017-12-07	highest	6	4	0	0	0	10	mas alto
H	app	2017-12-08	lowest	1	0	0	0	0	1	mas bajo
H	app	2017-12-08	low	0	0	0	0	0	0	bajo
H	app	2017-12-08	medium	0	1	0	0	0	1	medio
H	app	2017-12-08	high	5	8	4	1	0	18	alto
H	app	2017-12-08	highest	3	9	2	2	0	16	mas alto
H	paper map	2017-12-11	lowest	0	4	0	1	0	5	mas bajo
H	paper map	2017-12-11	low	1	5	1	0	0	7	bajo
H	paper map	2017-12-11	medium	0	0	0	0	0	0	medio
H	paper map	2017-12-11	high	2	1	1	2	0	6	alto
H	paper map	2017-12-11	highest	6	16	5	1	0	28	mas alto
H	paper map	2017-12-12	lowest	1	10	0	1	0	12	mas bajo
H	paper map	2017-12-12	low	3	5	4	5	0	17	bajo
H	paper map	2017-12-12	medium	3	4	6	2	0	15	medio
H	paper map	2017-12-12	high	1	0	0	0	0	1	alto
H	paper map	2017-12-12	highest	0	0	0	0	0	0	mas alto
H	paper map	2017-12-13	lowest	0	7	1	0	0	8	mas bajo
H	paper map	2017-12-13	low	5	5	1	0	0	11	bajo
H	paper map	2017-12-13	medium	2	4	0	0	0	6	medio
H	paper map	2017-12-13	high	3	4	1	1	0	9	alto
H	paper map	2017-12-13	highest	0	0	1	0	0	1	mas alto
H	paper map	2017-12-14	lowest	0	0	0	0	0	0	mas bajo
H	paper map	2017-12-14	low	0	0	0	0	0	0	bajo
H	paper map	2017-12-14	medium	1	5	1	3	0	10	medio
H	paper map	2017-12-14	high	1	1	1	0	0	3	alto
H	paper map	2017-12-14	highest	7	8	3	2	0	20	mas alto
H	paper map	2017-12-15	lowest	0	0	0	0	0	0	mas bajo
H	paper map	2017-12-15	low	0	3	1	1	0	5	bajo
H	paper map	2017-12-15	medium	0	4	1	0	0	5	medio
H	paper map	2017-12-15	high	2	5	3	1	0	11	alto
H	paper map	2017-12-15	highest	5	5	8	0	0	18	mas alto
